# Supplementary material for: Long-Term Exercise Alters the Profiles of Circulating Micro-RNAs in the Plasma of Young Women
Source: Front Physiol. 2020 May 8;11:372. doi: 10.3389/fphys.2020.00372 (PMC7233279; doi:10.3389/fphys.2020.00372)
Supplement: Supplementary file 1 [file Table_1.XLSX]

## Sheet: Sheet1
Table 1 Basic information of subjects
S group	Age	Training time（years)	C group	Age	Habitual exercise(years)
S1	18	6	C1	21	NO
S2	21	5	C2	20	NO
S3	21	8	C3	18	NO
S4	18	6	C4	19	NO
S5	20	6	C5	19	NO
S6	19	5	C6	19	NO
S7	23	11	C7	20	NO
S8	17	5	C8	19	NO
S9	17	5	C9	19	NO
S10	17	5	C10	19	NO
			C11	19	NO
			C12	19	NO
			C13	19	NO
			C14	21	NO
			C15	20	NO
